# Supplementary material for: Could the Microbiota Be a Predictive Factor for the Clinical Response to Probiotic Supplementation in IBS-D? A Cohort Study
Source: MDPI journal article supplement (doi:10.3390/microorganisms11020277), 2023-01-20
Supplement: s1 [file s1]

Supplementary material

**Table S1: Mucosal response to a 4-week supplementation with the multistrain probiotic in the per protocol population: crypt architecture, density, distribution and vessels in confocal endomicroscopy. Data are expressed as mean  $\pm$  SD.**

|                                                 | <b>Global population</b> |                  |
|-------------------------------------------------|--------------------------|------------------|
|                                                 | <b>V1</b>                | <b>V2</b>        |
| <b>Perimeter (px)</b>                           | 1510 $\pm$ 590           | 1504 $\pm$ 477   |
| <b>Sphericity (%)</b>                           | 41.5 $\pm$ 8.9           | 43 $\pm$ 10      |
| <b>Roundness (%)</b>                            | 48.1 $\pm$ 13.0          | 50.4 $\pm$ 10.5  |
| <b>Maximal Feret diameter (px)</b>              | 243.4 $\pm$ 39.6         | 243.3 $\pm$ 33.6 |
| <b>Elongation factor (ratio)</b>                | 1.4 $\pm$ 0.1            | 1.4 $\pm$ 0.1    |
| <b>Ma/ma ratio</b>                              | 1.2 $\pm$ 0.1            | 1.2 $\pm$ 0.1    |
| <b>Crypt density (ratio)</b>                    | 7.45 $\pm$ 1.96          | 7.93 $\pm$ 1.60  |
| <b>Minimal ICD (px)</b>                         | 548 $\pm$ 116            | 557 $\pm$ 147    |
| <b>Mean ICD (px)</b>                            | 335 $\pm$ 55             | 351 $\pm$ 58     |
| <b>Wall thickness (<math>\mu</math>m)</b>       | 365 $\pm$ 122            | 369 $\pm$ 140    |
| <b>Mean vessel area (%)</b>                     | 0.17 $\pm$ 0.04          | 0.17 $\pm$ 0.04  |
| <b>Mean vessel diameter (<math>\mu</math>m)</b> | 12.5 $\pm$ 0.74          | 12.45 $\pm$ 0.60 |
